# Supplementary material for: Combining computed tomography features of left atrial epicardial and pericoronary adipose tissue with the triglyceride-glucose index to predict the recurrence of atrial fibrillation after radiofrequency catheter ablation: a machine learning study
Source: PubMed Central journal article supplement — Quant Imaging Med Surg. 2024 Nov 29;14(12):9306–22. doi: 10.21037/qims-24-1393 (PMC11651957; doi:10.21037/qims-24-1393), 2024-11-29
Supplement: qims-14-12-9306-supplementary.pdf [file qims-14-12-9306-supplementary.pdf]

**Table S1** Comparison of AUC between the six machine learning models

| Comparison                          | <i>t</i> | P     |
|-------------------------------------|----------|-------|
| Random forest vs. SVM               | -0.419   | 0.697 |
| Random forest vs. KNN               | 6.090    | 0.004 |
| Random forest vs. gradient boosting | 1.153    | 0.313 |
| Random forest vs. decision Tree     | 3.388    | 0.028 |
| Random forest vs. XGBoost           | 3.226    | 0.032 |
| SVM vs. KNN                         | 3.353    | 0.028 |
| SVM vs. gradient boosting           | 0.731    | 0.505 |
| SVM vs. decision tree               | 3.749    | 0.020 |
| SVM vs. XGBoost                     | 1.748    | 0.155 |
| KNN vs. gradient boosting           | -2.139   | 0.099 |
| KNN vs. decision tree               | 1.807    | 0.145 |
| KNN vs. XGBoost                     | -0.878   | 0.430 |
| Gradient boosting vs. decision tree | 2.708    | 0.054 |
| Gradient boosting vs. XGBoost       | 1.531    | 0.200 |
| Decision tree vs. XGBoost           | -2.220   | 0.091 |

AUC, area under the curve; SVM, support vector machine; KNN, k-nearest neighbor; XGBoost, extreme gradient boosting.
